# Supplementary material for: Cardiac oxidative stress in a mouse model of neutral lipid storage disease
Source: PubMed Central journal article supplement — Biochim Biophys Acta. 2013 Nov;1831(11):1600–8. doi: 10.1016/j.bbalip.2013.07.004 (PMC3795454; doi:10.1016/j.bbalip.2013.07.004), 2013-11
Supplement: mmc1.pdf [file mmc1.pdf]

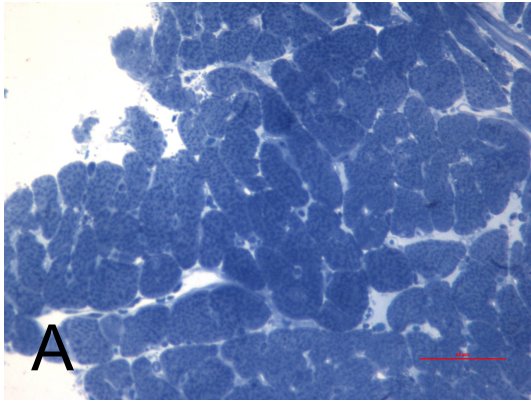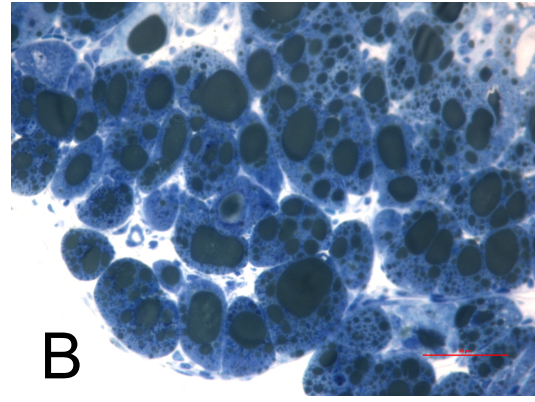

**Figure S1** Staining of lipid droplets in sections of hearts from WT and ATGL (-/-) mice. Semi-thin cross sections of cardiac muscle from control (**A**) and ATGL(-/-) (**B**) animals stained with azur-methylene blue. Numerous lipid droplets up to 30  $\mu\text{m}$  in diameter covering more than 50% of the total are visible in cardiac sections from ATGL (-/-) mice.
